# Supplementary material for: In situ synthesis of coaxial CsPbX3@polymer (X = Cl, Br, I) fibers with significantly enhanced water stability
Source: Royal Society of Chemistry journal article supplement (doi:10.1039/d0tc04035e), 2020-01-01
Supplement: d0tc04035e1.pdf [file d0tc04035e1.pdf]

**Electronic Supplementary Material (ESI) of**

**In situ synthesis of coaxial CsPbX<sub>3</sub>@polymer (X=Cl, Br, I)  
fibers with significantly enhanced water stability**

Wenna Liu<sup>a</sup>, Hui Fu<sup>b</sup>, Hao Liao<sup>b</sup>, Zhao Liang<sup>b</sup>, Yumin Ye<sup>a</sup>, Jinju Zheng<sup>b,\*</sup>, Weiyou Yang<sup>b,\*</sup>

*a. Ningbo Key Laboratory of Specialty Polymers, Faculty of Materials Science and Chemical Engineering, Ningbo University, Ningbo 315211, China.*

*b. Institute of Materials, Ningbo University of Technology, Ningbo, 315016, P.R. China*

*E-mail: [weiyouyang@tsinghua.org.cn](mailto:weiyouyang@tsinghua.org.cn), [zhengzhao2007@163.com](mailto:zhengzhao2007@163.com)*

## Experimental section

**1.1 Materials:** Lead(II) chloride ( $\text{PbCl}_2$ , 99%), lead(II) bromide ( $\text{PbBr}_2$ , 99%), lead(II) iodide ( $\text{PbI}_2$ , 99.9%), cesium chloride ( $\text{CsCl}$ , 99%), cesium bromide ( $\text{CsBr}$ , 99%), cesium iodide ( $\text{CsI}$ , 99.9%), oleylamine (OAm, 80%), oleic acid (OA, 90%), and PS (average MW  $\approx 192000$ ) were purchased from Aldrich. Dimethyl Formamide (DMF, analytical grade) and dimethylsulfoxide (DMSO, analytical grade) were obtained from Beijing Chemical Reagent Co. Ltd. China.

**1.2 Preparation of spinning solution for core and shell:** The core solution, 0.15 mmol  $\text{PbX}_2$  and 0.15 mmol CsX were dissolved in 3 mL solvent of DMF (for  $\text{CsPbBr}_3$  and  $\text{CsPbI}_3$ ), or 1.5 mL DMF+1.5 mL DMSO cosolvent (for  $\text{CsPbCl}_3$ ), followed by adding 0.2 mL OA and 0.06 mL OAm as the stabilizers. Then 0.9 g PS ( $300 \text{ mg mL}^{-1}$ ) were dissolved in the above precursor solution to form a homogeneously core solution, called as perovskite precursor. The shell solution was prepared by dissolving 0.9 g PS in 3 mL DMF ( $300 \text{ mg mL}^{-1}$ ).

**1.3 Preparation of  $\text{CsPbX}_3@$ PS coaxial fibers:** A two-fluid coaxial electrospinning process was used to fabricate the  $\text{CsPbX}_3@$ PS coaxial fibers. Schematic 1 shows the schematic of the experimental setup. Two syringes were used and each syringe was connected to a separate needle, for which one needle with diameter of 0.25 mm was placed inside the other with diameter of 0.85 mm to form the two-fluid coaxial electrospinning system, with the perovskite precursor solution in the core and the polymer solution in the shell. The two solutions were continuously fed into the coaxial needle by two syringe pumps. The flow rate of both the core and shell solutions was  $0.02 \text{ mL min}^{-1}$ . The tip of the needle was connected to a high-voltage power supply. The voltage was set at 15 kV and the working distance (the distance between the tip of the needle and collector) was 15 cm for collecting the coaxial fibers. The electrospinning process was operated at  $25^\circ\text{C}$  and 50% relative humidity. All of the collected fibers were placed in a conventional oven at  $50^\circ\text{C}$  for 2 h before characterization. In order to verify the importance of the core/shell structure, a comparison experiment was performed, typically  $\text{CsPbBr}_3@$ PS fibers which without shell layer were prepared too.

**1.4 Characterization:** The morphology and microstructure of obtained CsPbX<sub>3</sub>@PS coaxial fibers were examined by means of X-ray diffraction (XRD, D8 Advance, Bruker, Germany) with *Cu-K $\alpha$*  radiation with a wavelength of 1.5406 Å, and field emission scanning electron microscopy (FESEM, S-4800, Hitachi, Japan). The UV-visible absorption was recorded on an UV-visible scanning spectrophotometer (U-3900, Hitachi, Japan). The PL spectra were measured using a spectrometer (Fluoromax-4P, Horiba Jobin Yvon, France).

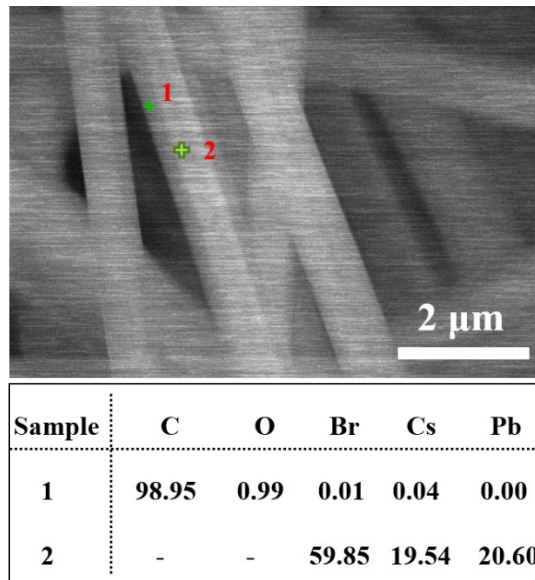

**Figure S1.** Energy spectrum analysis of the coaxial fiber.

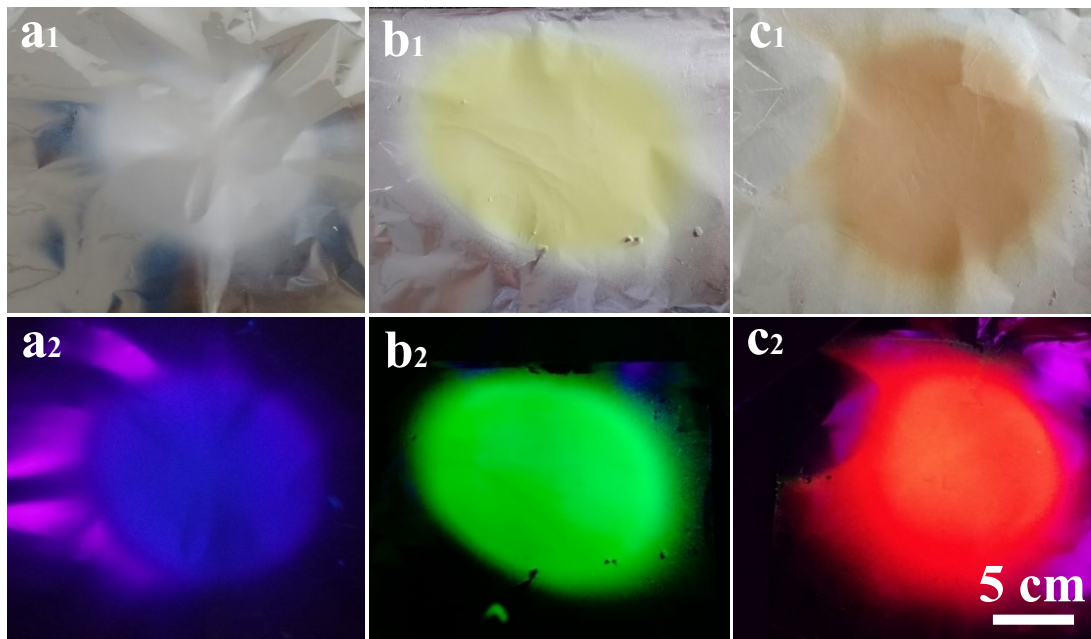

**Figure S2.** Digital photos of the large scale (a<sub>1</sub>) CsPbCl<sub>3</sub>@PS, (b<sub>1</sub>) CsPbBr<sub>3</sub>@PS, (c<sub>1</sub>) CsPbI<sub>3</sub>@PS coaxial fibers and (a<sub>2</sub>-c<sub>2</sub>) are their corresponding digital photos under 365 nm UV light.
